# Supplementary material for: Cardiometabolic Health in Relation to Lifestyle and Body Weight Changes 3–8 Years Earlier
Source: Nutrients. 2018 Dec 10;10(12):1953. doi: 10.3390/nu10121953 (PMC6315733; doi:10.3390/nu10121953)
Supplement: Supplementary file 1 [file nutrients-10-01953-s001.pdf]

**Table S1.** Characteristics and baseline cardiometabolic health of participants versus the non-participants.

|                                                     | Participants<br>(N=111) | Non-participants<br>(N=463) | P-<br>value |
|-----------------------------------------------------|-------------------------|-----------------------------|-------------|
| Age at baseline (years; mean; SD)                   | 30.4 (4.1)              | 29.6 (4.6)                  | 0.07        |
| Caucasian (N; %)                                    | 105 (94.6)              | 397 (85.7)                  | 0.01        |
| Education level (N; %)                              |                         |                             |             |
| No education or primary school<br>(4-12 years)      | 1 (0.9)                 | 26 (5.9)                    | 0.17        |
| Secondary education                                 | 25 (23.6)               | 106 (23.9)                  |             |
| Intermediate Vocational Education                   | 52 (49.1)               | 214 (48.3)                  |             |
| Higher Vocational Education or<br>University        | 28 (26.4)               | 97 (21.9)                   |             |
| PCOS (yes; N; %)                                    | 43 (38.7)               | 158 (34.3)                  | 0.38        |
| Cardiovascular outcomes at baseline                 |                         |                             |             |
| BMI at randomization (kg/m <sup>2</sup> ; mean; SD) | 35.7 (3.0)              | 36.1 (3.5)                  | 0.19        |
| Systolic blood pressure<br>(mmHg; mean; SD)         | 125.4 (12.3)            | 126.7 (14.3)                | 0.39        |
| Diastolic blood pressure<br>(mmHg; mean; SD)        | 80.4 (7.8)              | 79.6 (9.4)                  | 0.41        |
| Metabolic outcomes at baseline                      |                         |                             |             |
| Glucose (mmol/L; mean; SD)                          | 5.3 (0.7)               | 5.4 (0.7)                   | 0.59        |
| Insulin (pmol/L; mean; SD)                          | 14.0 (7.2)              | 14.5 (8.4)                  | 0.54        |
| HOMA-IR (mean; SD)                                  | 0.6 (0.4)               | 0.6 (0.4)                   | 0.67        |
| Triglycerides (mmol/L; mean; SD)                    | 1.3 (1.1)               | 1.3 (1.3)                   | 0.82        |
| Total cholesterol (mmol/L; mean; SD)                | 4.7 (0.9)               | 4.8 (0.9)                   | 0.39        |
| LDL-C (mmol/L; mean; SD)                            | 3.0 (0.8)               | 3.1 (0.8)                   | 0.33        |
| HDL-C (mmol/L; mean; SD)                            | 1.2 (0.3)               | 1.2 (0.3)                   | 0.38        |
| Metabolic syndrome at baseline (yes; N; %)          | 46 (51.7)               | 213 (55.8)                  | 0.49        |
| Change in dietary intake and physical activity*     |                         |                             |             |
| Vegetable intake (gram/day; mean; SD)               | 1.9 (58.7)              | 3.6 (66.7)                  | 0.83        |
| Fruit intake (gram/day; mean; SD)                   | 25.6 (75.6)             | 14.4 (70.6)                 | 0.19        |
| Sugary drinks (glasses/day; mean; SD)               | -0.4 (1.8)              | -0.5 (2.5)                  | 0.81        |
| Savoury snacks<br>(handful/week; mean; SD)          | -1.7 (5.6)              | -3.4 (8.5)                  | 0.07        |
| Sweet snacks<br>(portion/week; mean; SD)            | -0.1 (5.6)              | -3.3 (10.2)                 | <0.001      |
| Total MVPA<br>(hour/week; mean; SD)                 | 1.1 (12.1)              | 0.7 (13.6)                  | 0.83        |
| Change in body weight (kg; mean; SD)                | -2.6 (5.1)              | -2.8 (5.4)                  | 0.78        |

PCOS = Polycystic Ovary Syndrome; BMI = Body Mass Index; HOMA-IR = Homeostatic Model Assessment of Insulin Resistance; LDL-C = low-density lipoproteins cholesterol; HDL-C = high-density lipoproteins cholesterol; MVPA = Moderate to Vigorous Physical Activity. \* For all variables the change was calculated as preferably 6 months or otherwise 3 months minus baseline. If a higher score on the change variable is favorable or not depends on the independent variable of interest: A higher change score for vegetable intake, fruit intake, and MVPA is healthier, while a higher change score for sugary drink intake, savory and sweet snack intake, and weight change (higher means weight gain instead of weight loss) is unhealthier.
